# Supplementary material for: Exploring priming responses involved in peach fruit acclimation to cold stress
Source: PubMed Central journal article supplement (PMC5595836; doi:10.1038/s41598-017-11933-3), 2017-09-12
Supplement: 41598_2017_11933_MOESM1_ESM.pdf [file 41598_2017_11933_MOESM1_ESM.pdf]

# **Exploring priming responses *involved in* peach fruit acclimation to cold stress**

*Georgia Tanou, Ioannis S. Minas , Federico Scossa, Maya Belghazi, Aiki Xanthopoulou, Ioannis Ganopoulos, Panagiotis Madesis, Alisdair Fernie & Athanassios Molassiotis*

## **Supplementary data**

Supplementary Figures 1-4

Supplementary Tables S1, S5 and S6

### **Additional Information**

**Fig. S1** Peach fruit quality and CI parameters following 20 d cold treatment.

**Fig. S2** Ethylene biosynthesis during peach ripening at 20 °C following 20 d cold treatment.

**Fig. S3** Reference 2DE-gel map of peach mesocarp tissue.

**Fig. S4** Representative 2-DE gels exhibiting protein abundance changes for pre-cold and symptomatic fruit.

**Fig. S5** VENN diagram displaying the effect of cold and ripening in each treatment.

**Table S1** Primers used in this study.

**Table S2** Metabolite reporting guidelines.

**Table S3** Quantitative data for peach protein spot volumes.

**Table S4** Sequence data for peach proteins.

**Table S5.** Principal component analysis of metabolic profiles.

**Table S6.** Quantitative results of metabolite analysis.

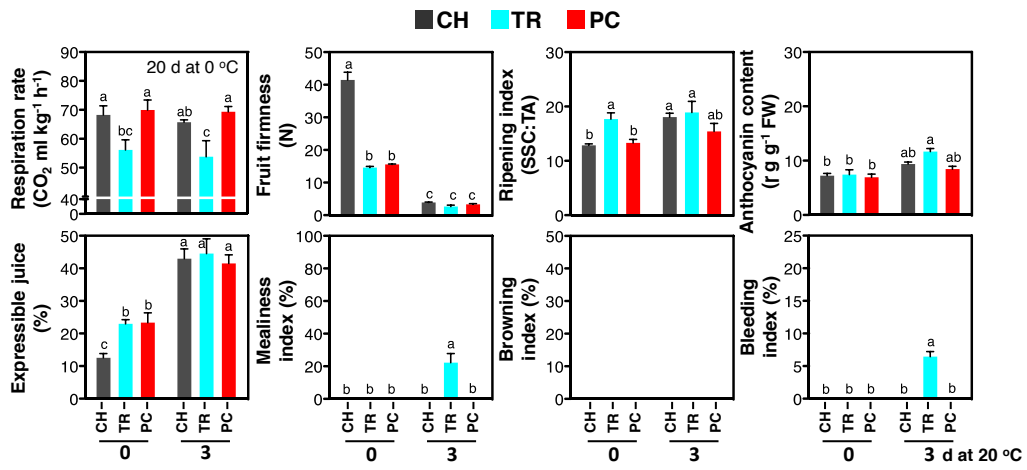

**Supplementary Figure 1**

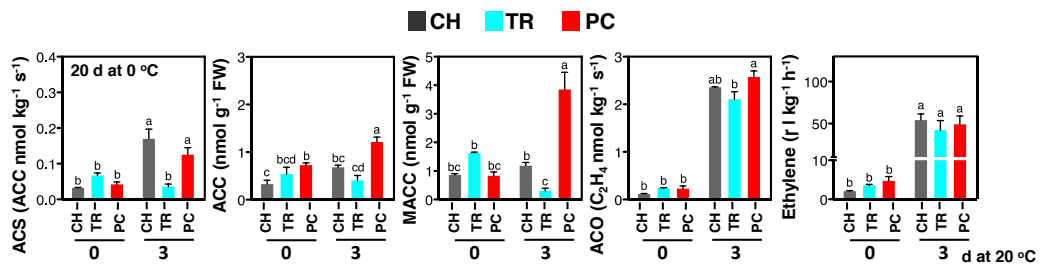

Supplementary Figure 2

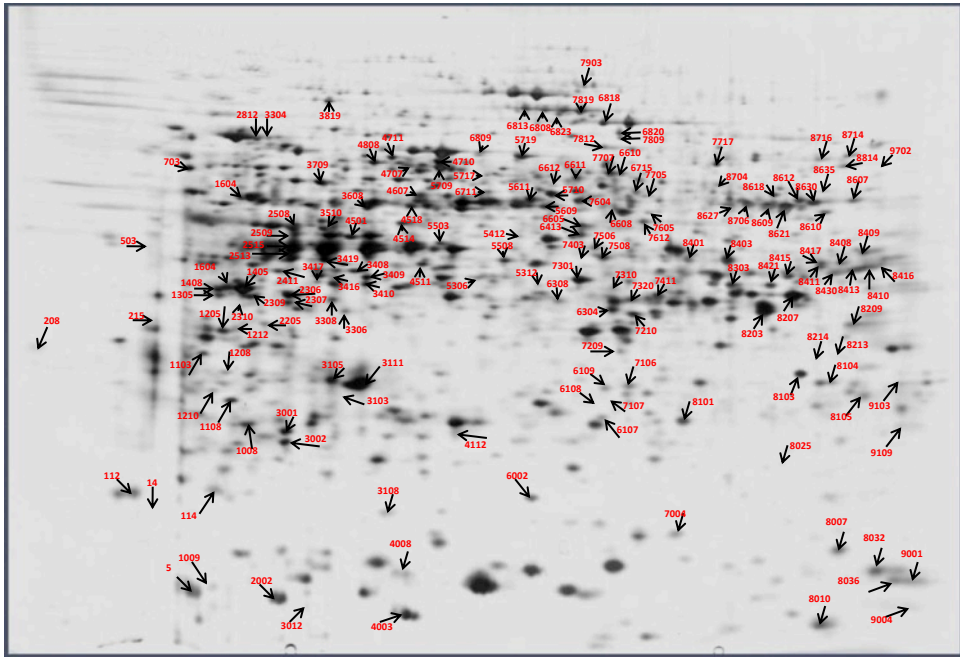

Supplementary Figure 3

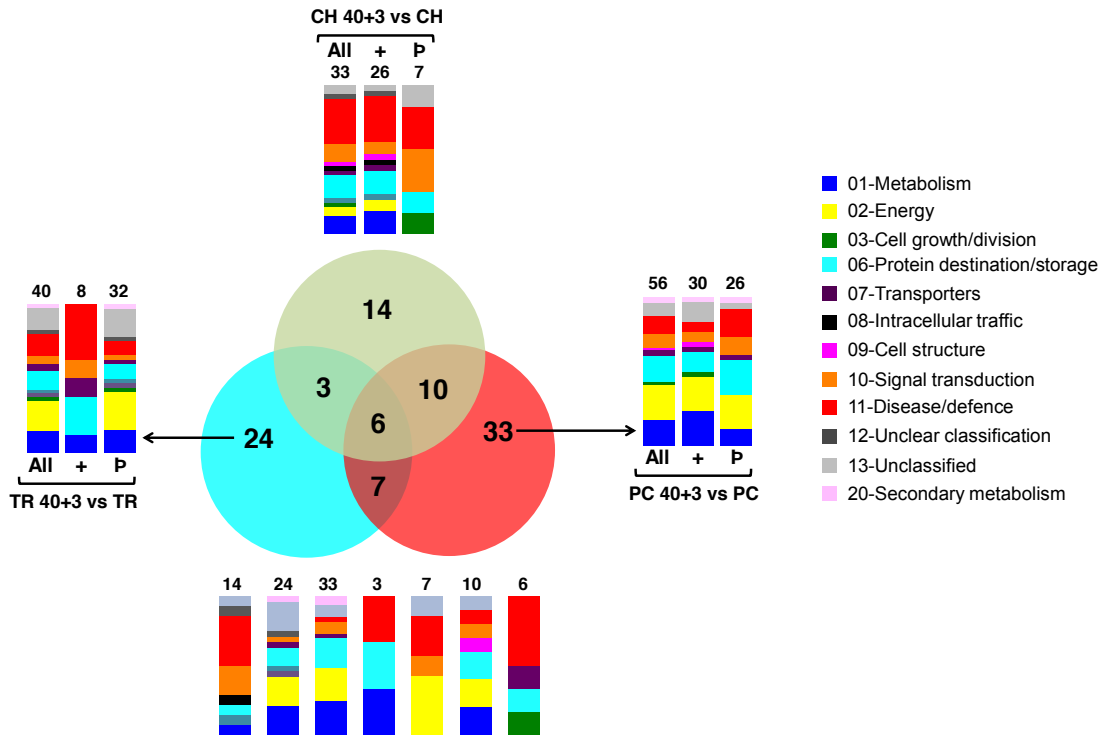

Supplementary Figure 4

**Supplementary Table S1:** Primers used for quantitative real-time PCR assays.

| <b>Primer name</b> | <b>Forward 5'-3'</b>        | <b>Reverse 5'-3'</b>        | <b>Gene /enzyme target</b>        |
|--------------------|-----------------------------|-----------------------------|-----------------------------------|
| Ppe ASR1           | GGCCTCTTCAACCAGGACAGAG      | CTAGCACGACGCTCTTCACCAC      | ASR1                              |
| Ppe ACOX           | ATGGAGGGCGTTGATCATTTAGC     | ATCCGTTTCCATCCATGAGCTG      | ACOX                              |
| PpeACX2            | ATGCAAAGCCCCTACCCAGATC      | CGTCTGAAGATCAGGCCTGTTG      | ACX2                              |
| PpeDynam           | GGAGGCGATCGAGGAGTTGTTG      | TAATGGGAGCCCGAGTAGCACC      | DNM1                              |
| PpeEF              | GTCGCAACAAAAACCCTAGCCAGC    | GTCTTCCCTGCATGCAAGACCAG     | EF1                               |
| PpeFBA             | ATGTCGGCCTTCAAGGGAAAGTAC    | CAGCTGTCTTTTGGTAGAGGGTTTC   | FBA                               |
| PpeGABA-T          | GTCTTCTTGGATCCAACCTCAGAAC   | AGCATCTCATGCCCTTGAACC       | GABA-T                            |
| PpeGSH             | GCTCTGCCCTTCTACTCGCTTTC     | CGATCGCAAAGTACACCAAACCGG    | GSH                               |
| PpeGAPDH           | GGGGAAGATCAAGATCGGAATCAAC   | TGTTTGCGTCCCTAAGCTTGACATC   | GAPDH                             |
| PpePTEN            | TGAACAACCTAACATCTCTCCTTCAAC | CTTCACTATATCCACCAGTATTACGCC | PTEN                              |
| PpePEPCK           | GGTGAAGGCGAAGACCATCGAC      | CTTCTGGCCCTCCGATTTCTCCTC    | PEPCK                             |
| PpePFP-beta        | ACCTGGAGGGCACAATGTGATTTTC   | GGCCATCCAAATCCAGCTTAC       | PFP-beta                          |
| PpeASAT            | AGGATCCAATACTTGGGGTGACTG    | CACCAAGAATCAGCTTAGCACTCAG   | ASAT                              |
| PpeNADP-ME         | GAAACGGCAGCGTAGTGATGGAG     | TGGTGTGGATCCCGTATCAACG      | NADP-ME                           |
| PpeECH             | TTATGAATGGGATTGCAATGGGAGC   | TTTCAGCACCATCCAACATTGTACC   | ECH                               |
| PpePRX             | GGTGTGGTGGAGCAAGCTCAAC      | GGGCAAACATTCTCGAGTGCAG      | PRX                               |
| PpeKin             | GAACGTCGCCCGCTTTAACTTC      | AATGGTGATTTCTGCCCTTCTCCTT   | Kin                               |
| PpeSUB             | AGAACATCCAGGTGGTGACTAGG     | ATTCGGCGTACCCACATTTGTC      | SUB                               |
| PpeeIF             | CCCACAAGCTGGAGAGGAAGT       | CCCTCCATTAGCACACTCAGG       | eIF                               |
| PpeTPI             | TCCACATCTCTCGTTCCCAAC       | CAAAGAACTTTCAGTGCCGGC       | TPI                               |
| PpeDihAcidDehyDr   | CATCTAATGGGCCCCACCACCTCAG   | ACTCCGTGTAGAATGGCCTGGGACC   | dihydroxy-<br>acid<br>dehydratase |
| PpeketRedIso       | TGTCGTCAGCATCCAAAACCCACG    | GGGGGCTTAACAGTAGGCATTGACACC | NADP+                             |
| PpeAcetLacSyn      | CCATTGCTCCACCTTCTTCCGCCTC   | TAGTGGTGGTGGTGGTGGTGGC      | ALS                               |

## Supplementary Table S5

**Supplementary Table S5.** Principal component analysis for comparison of metabolic profiles.

| PC | Eigenvalue | Percent | Cumulative percent |
|----|------------|---------|--------------------|
| 1  | 16,570     | 35,256  | 35,256             |
| 2  | 9,376      | 19,949  | 55,205             |
| 3  | 4,496      | 9,567   | 64,771             |
| 4  | 4,251      | 9,044   | 73,815             |
| 5  | 3,820      | 8,127   | 81,942             |
| 6  | 1,945      | 4,139   | 86,081             |
| 7  | 1,389      | 2,955   | 89,036             |
| 8  | 0,947      | 2,015   | 91,051             |
| 9  | 0,914      | 1,945   | 92,996             |
| 10 | 0,674      | 1,434   | 94,430             |
| 11 | 0,451      | 0,959   | 95,389             |
| 12 | 0,417      | 0,887   | 96,276             |
| 13 | 0,322      | 0,685   | 96,960             |
| 14 | 0,281      | 0,599   | 97,559             |
| 15 | 0,264      | 0,563   | 98,122             |
| 16 | 0,192      | 0,409   | 98,530             |
| 17 | 0,145      | 0,308   | 98,838             |
| 18 | 0,109      | 0,232   | 99,071             |
| 19 | 0,085      | 0,180   | 99,251             |
| 20 | 0,069      | 0,146   | 99,397             |
| 21 | 0,053      | 0,113   | 99,510             |
| 22 | 0,047      | 0,100   | 99,609             |
| 23 | 0,039      | 0,084   | 99,693             |
| 24 | 0,037      | 0,078   | 99,771             |
| 25 | 0,030      | 0,064   | 99,834             |
| 26 | 0,023      | 0,049   | 99,883             |
| 27 | 0,015      | 0,033   | 99,916             |
| 28 | 0,011      | 0,023   | 99,939             |
| 29 | 0,009      | 0,020   | 99,960             |
| 30 | 0,007      | 0,014   | 99,974             |

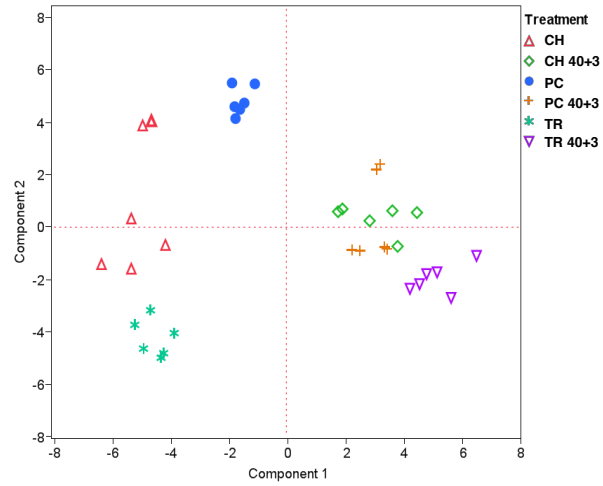



## Supplementary Table S6

| Supplementary Table S6. Relative metabolite levels in peach mesocarp under different treatments (expressed as normalized intensity values per g FW $\pm$ SE). Different letters indicate significant differences at the level of $\alpha=0.05$ (LSD test) |                                 |                                 |                                 |                                 |                                 |                                 |
|-----------------------------------------------------------------------------------------------------------------------------------------------------------------------------------------------------------------------------------------------------------|---------------------------------|---------------------------------|---------------------------------|---------------------------------|---------------------------------|---------------------------------|
|                                                                                                                                                                                                                                                           | CH                              | TR                              | PC                              | CH 40+3                         | TR 40+3                         | PC 40+3                         |
| <b>Amino acids</b>                                                                                                                                                                                                                                        |                                 |                                 |                                 |                                 |                                 |                                 |
| Alanine                                                                                                                                                                                                                                                   | 2.55 $\pm$ 0.30 <sup>d</sup>    | 3.56 $\pm$ 0.30 <sup>cd</sup>   | 3.84 $\pm$ 0.28 <sup>c</sup>    | 6.77 $\pm$ 0.40 <sup>b</sup>    | 9.31 $\pm$ 0.48 <sup>a</sup>    | 7.65 $\pm$ 0.43 <sup>b</sup>    |
| Valine                                                                                                                                                                                                                                                    | 0.9 $\pm$ 0.04 <sup>c</sup>     | 0.75 $\pm$ 0.05 <sup>c</sup>    | 1.92 $\pm$ 0.03 <sup>a</sup>    | 1.57 $\pm$ 0.12 <sup>b</sup>    | 1.81 $\pm$ 0.08 <sup>a</sup>    | 1.78 $\pm$ 0.09 <sup>ab</sup>   |
| Isoleucine                                                                                                                                                                                                                                                | 0.38 $\pm$ 0.00 <sup>d</sup>    | 0.25 $\pm$ 0.02 <sup>e</sup>    | 0.91 $\pm$ 0.02 <sup>a</sup>    | 0.57 $\pm$ 0.06 <sup>c</sup>    | 0.68 $\pm$ 0.02 <sup>b</sup>    | 0.62 $\pm$ 0.06 <sup>bc</sup>   |
| Proline                                                                                                                                                                                                                                                   | 2.31 $\pm$ 0.39 <sup>b</sup>    | 1.11 $\pm$ 0.09 <sup>d</sup>    | 1.93 $\pm$ 0.12 <sup>bc</sup>   | 4.06 $\pm$ 0.4 <sup>a</sup>     | 1.67 $\pm$ 0.27 <sup>bcd</sup>  | 1.23 $\pm$ 0.03 <sup>cd</sup>   |
| Serine                                                                                                                                                                                                                                                    | 2.39 $\pm$ 0.18 <sup>d</sup>    | 2.19 $\pm$ 0.1 <sup>d</sup>     | 4.30 $\pm$ 0.16 <sup>c</sup>    | 6.19 $\pm$ 0.23 <sup>a</sup>    | 4.91 $\pm$ 0.18 <sup>b</sup>    | 6.42 $\pm$ 0.25 <sup>a</sup>    |
| Threonine                                                                                                                                                                                                                                                 | 1.30 $\pm$ 0.08 <sup>b</sup>    | 0.96 $\pm$ 0.06 <sup>c</sup>    | 1.33 $\pm$ 0.07 <sup>b</sup>    | 1.47 $\pm$ 0.04 <sup>ab</sup>   | 1.29 $\pm$ 0.04 <sup>b</sup>    | 1.56 $\pm$ 0.09 <sup>a</sup>    |
| Beta-Alanine                                                                                                                                                                                                                                              | 0.030 $\pm$ 0.001 <sup>c</sup>  | 0.040 $\pm$ 0.002 <sup>a</sup>  | 0.031 $\pm$ 0.001 <sup>bc</sup> | 0.031 $\pm$ 0.001 <sup>bc</sup> | 0.034 $\pm$ 0.002 <sup>b</sup>  | 0.039 $\pm$ 0.000 <sup>a</sup>  |
| 4-aminobutyric acid (GABA)                                                                                                                                                                                                                                | 0.84 $\pm$ 0.03 <sup>c</sup>    | 0.76 $\pm$ 0.03 <sup>c</sup>    | 0.85 $\pm$ 0.02 <sup>c</sup>    | 1.43 $\pm$ 0.10 <sup>a</sup>    | 1.16 $\pm$ 0.10 <sup>b</sup>    | 1.46 $\pm$ 0.08 <sup>a</sup>    |
| Aspartic acid                                                                                                                                                                                                                                             | 5.47 $\pm$ 1.35 <sup>b</sup>    | 3.47 $\pm$ 0.09 <sup>bc</sup>   | 9.27 $\pm$ 0.67 <sup>a</sup>    | 4.94 $\pm$ 0.63 <sup>b</sup>    | 2.27 $\pm$ 0.25 <sup>c</sup>    | 4.85 $\pm$ 0.43 <sup>b</sup>    |
| Cysteine                                                                                                                                                                                                                                                  | 1.05 $\pm$ 0.04 <sup>bc</sup>   | 0.88 $\pm$ 0.07 <sup>c</sup>    | 1.66 $\pm$ 0.08 <sup>a</sup>    | 1.10 $\pm$ 0.02 <sup>b</sup>    | 1.10 $\pm$ 0.05 <sup>b</sup>    | 1.17 $\pm$ 0.07 <sup>b</sup>    |
| Pyroglutamic acid                                                                                                                                                                                                                                         | 2.72 $\pm$ 0.46 <sup>bc</sup>   | 2.56 $\pm$ 0.08 <sup>c</sup>    | 3.40 $\pm$ 0.18 <sup>a</sup>    | 2.95 $\pm$ 0.08 <sup>abc</sup>  | 3.24 $\pm$ 0.19 <sup>ab</sup>   | 2.44 $\pm$ 0.09 <sup>c</sup>    |
| Glutamic acid                                                                                                                                                                                                                                             | 2.25 $\pm$ 0.40 <sup>ab</sup>   | 1.84 $\pm$ 0.04 <sup>bc</sup>   | 2.48 $\pm$ 0.14 <sup>a</sup>    | 1.86 $\pm$ 0.10 <sup>bc</sup>   | 1.53 $\pm$ 0.10 <sup>c</sup>    | 1.88 $\pm$ 0.09 <sup>bc</sup>   |
| Phenylalanine                                                                                                                                                                                                                                             | 0.24 $\pm$ 0.00 <sup>c</sup>    | 0.23 $\pm$ 0.02 <sup>c</sup>    | 0.56 $\pm$ 0.03 <sup>a</sup>    | 0.35 $\pm$ 0.03 <sup>b</sup>    | 0.38 $\pm$ 0.03 <sup>b</sup>    | 0.55 $\pm$ 0.04 <sup>a</sup>    |
| Asparagine                                                                                                                                                                                                                                                | 14.52 $\pm$ 0.19 <sup>a</sup>   | 10.69 $\pm$ 0.63 <sup>b</sup>   | 10.35 $\pm$ 0.49 <sup>bc</sup>  | 11.17 $\pm$ 0.26 <sup>b</sup>   | 9.17 $\pm$ 0.43 <sup>c</sup>    | 11.43 $\pm$ 0.60 <sup>b</sup>   |
| Ornithine                                                                                                                                                                                                                                                 | 0.038 $\pm$ 0.007 <sup>a</sup>  | 0.051 $\pm$ 0.013 <sup>a</sup>  | 0.044 $\pm$ 0.002 <sup>a</sup>  | 0.037 $\pm$ 0.000 <sup>a</sup>  | 0.040 $\pm$ 0.004 <sup>a</sup>  | 0.039 $\pm$ 0.002 <sup>a</sup>  |
| Tyrosine                                                                                                                                                                                                                                                  | 0.156 $\pm$ 0.005 <sup>bc</sup> | 0.136 $\pm$ 0.010 <sup>cd</sup> | 0.198 $\pm$ 0.006 <sup>a</sup>  | 0.120 $\pm$ 0.005 <sup>d</sup>  | 0.166 $\pm$ 0.012 <sup>b</sup>  | 0.175 $\pm$ 0.009 <sup>ab</sup> |
| <b>Sugars</b>                                                                                                                                                                                                                                             |                                 |                                 |                                 |                                 |                                 |                                 |
| Fucose                                                                                                                                                                                                                                                    | 0.49 $\pm$ 0.01 <sup>d</sup>    | 0.56 $\pm$ 0.02 <sup>d</sup>    | 1.61 $\pm$ 0.03 <sup>a</sup>    | 1.33 $\pm$ 0.06 <sup>b</sup>    | 0.93 $\pm$ 0.03 <sup>c</sup>    | 1.60 $\pm$ 0.05 <sup>a</sup>    |
| 1-O-methyl-alpha-D-mannopyranoside                                                                                                                                                                                                                        | 0.32 $\pm$ 0.02 <sup>b</sup>    | 0.40 $\pm$ 0.02 <sup>a</sup>    | 0.32 $\pm$ 0.00 <sup>b</sup>    | 0.29 $\pm$ 0.01 <sup>b</sup>    | 0.25 $\pm$ 0.01 <sup>c</sup>    | 0.30 $\pm$ 0.01 <sup>b</sup>    |
| 1-O-methyl-alpha-D-glucopyranoside                                                                                                                                                                                                                        | 0.54 $\pm$ 0.02 <sup>b</sup>    | 0.48 $\pm$ 0.02 <sup>b</sup>    | 0.69 $\pm$ 0.00 <sup>a</sup>    | 0.67 $\pm$ 0.03 <sup>a</sup>    | 0.67 $\pm$ 0.03 <sup>a</sup>    | 0.48 $\pm$ 0.04 <sup>b</sup>    |
| Maltose                                                                                                                                                                                                                                                   | 0.65 $\pm$ 0.01 <sup>bc</sup>   | 0.67 $\pm$ 0.03 <sup>bc</sup>   | 0.74 $\pm$ 0.01 <sup>a</sup>    | 0.78 $\pm$ 0.04 <sup>a</sup>    | 0.63 $\pm$ 0.03 <sup>c</sup>    | 0.71 $\pm$ 0.01 <sup>ab</sup>   |
| alpha,alpha'-D-trehalose                                                                                                                                                                                                                                  | 0.07 $\pm$ 0.00 <sup>d</sup>    | 0.10 $\pm$ 0.01 <sup>b</sup>    | 0.08 $\pm$ 0.00 <sup>cd</sup>   | 0.16 $\pm$ 0.01 <sup>a</sup>    | 0.17 $\pm$ 0.01 <sup>a</sup>    | 0.10 $\pm$ 0.00 <sup>bc</sup>   |
| Isomaltose                                                                                                                                                                                                                                                | 0.05 $\pm$ 0.00 <sup>d</sup>    | 0.02 $\pm$ 0.00 <sup>c</sup>    | 0.06 $\pm$ 0.00 <sup>d</sup>    | 0.16 $\pm$ 0.01 <sup>a</sup>    | 0.13 $\pm$ 0.01 <sup>b</sup>    | 0.10 $\pm$ 0.00 <sup>c</sup>    |
| Raffinose                                                                                                                                                                                                                                                 | 0.21 $\pm$ 0.01 <sup>c</sup>    | 0.32 $\pm$ 0.02 <sup>c</sup>    | 0.22 $\pm$ 0.01 <sup>c</sup>    | 1.12 $\pm$ 0.09 <sup>b</sup>    | 1.71 $\pm$ 0.15 <sup>a</sup>    | 1.04 $\pm$ 0.03 <sup>b</sup>    |
| Xylose                                                                                                                                                                                                                                                    | 2.46 $\pm$ 0.18 <sup>d</sup>    | 2.13 $\pm$ 0.08 <sup>d</sup>    | 3.66 $\pm$ 0.13 <sup>c</sup>    | 11.15 $\pm$ 0.73 <sup>a</sup>   | 8.48 $\pm$ 0.15 <sup>b</sup>    | 10.61 $\pm$ 0.31 <sup>a</sup>   |
| Fructose                                                                                                                                                                                                                                                  | 64.87 $\pm$ 3.41 <sup>d</sup>   | 64.79 $\pm$ 2.86 <sup>d</sup>   | 73.07 $\pm$ 2.30 <sup>cd</sup>  | 98.23 $\pm$ 3.54 <sup>b</sup>   | 119.48 $\pm$ 4.56 <sup>a</sup>  | 79.98 $\pm$ 1.99 <sup>c</sup>   |
| Glucose                                                                                                                                                                                                                                                   | 235.54 $\pm$ 11.29 <sup>c</sup> | 239.83 $\pm$ 10.60 <sup>c</sup> | 252.32 $\pm$ 8.06 <sup>c</sup>  | 301.94 $\pm$ 12.21 <sup>b</sup> | 387.11 $\pm$ 17.21 <sup>a</sup> | 225.55 $\pm$ 7.57 <sup>c</sup>  |
| Sucrose                                                                                                                                                                                                                                                   | 185.14 $\pm$ 7.46 <sup>b</sup>  | 254.33 $\pm$ 9.01 <sup>a</sup>  | 175.06 $\pm$ 8.19 <sup>bc</sup> | 165.31 $\pm$ 6.53 <sup>bc</sup> | 152.88 $\pm$ 9.07 <sup>c</sup>  | 177.94 $\pm$ 5.84 <sup>b</sup>  |
| <b>Sugar-alcohols</b>                                                                                                                                                                                                                                     |                                 |                                 |                                 |                                 |                                 |                                 |
| Maltitol                                                                                                                                                                                                                                                  | 0.18 $\pm$ 0.01 <sup>b</sup>    | 0.17 $\pm$ 0.01 <sup>b</sup>    | 0.21 $\pm$ 0.00 <sup>a</sup>    | 0.22 $\pm$ 0.01 <sup>a</sup>    | 0.17 $\pm$ 0.01 <sup>b</sup>    | 0.21 $\pm$ 0.00 <sup>a</sup>    |
| Sorbitol                                                                                                                                                                                                                                                  | 10.23 $\pm$ 0.84 <sup>a</sup>   | 11.91 $\pm$ 0.66 <sup>a</sup>   | 7.43 $\pm$ 0.23 <sup>b</sup>    | 10.58 $\pm$ 0.62 <sup>a</sup>   | 7.23 $\pm$ 0.86 <sup>b</sup>    | 6.21 $\pm$ 0.33 <sup>b</sup>    |
| Myo-inositol                                                                                                                                                                                                                                              | 11.56 $\pm$ 0.39 <sup>a</sup>   | 11.10 $\pm$ 0.56 <sup>a</sup>   | 10.89 $\pm$ 0.39 <sup>a</sup>   | 5.91 $\pm$ 0.25 <sup>b</sup>    | 5.22 $\pm$ 0.47 <sup>bc</sup>   | 4.34 $\pm$ 0.13 <sup>c</sup>    |
| <b>Organic acids</b>                                                                                                                                                                                                                                      |                                 |                                 |                                 |                                 |                                 |                                 |
| Pyruvic acid                                                                                                                                                                                                                                              | 0.101 $\pm$ 0.003 <sup>a</sup>  | 0.090 $\pm$ 0.004 <sup>b</sup>  | 0.088 $\pm$ 0.003 <sup>b</sup>  | 0.039 $\pm$ 0.002 <sup>c</sup>  | 0.028 $\pm$ 0.001 <sup>d</sup>  | 0.032 $\pm$ 0.001 <sup>cd</sup> |
| Glyceric acid                                                                                                                                                                                                                                             | 0.078 $\pm$ 0.006 <sup>b</sup>  | 0.060 $\pm$ 0.002 <sup>de</sup> | 0.094 $\pm$ 0.003 <sup>a</sup>  | 0.073 $\pm$ 0.004 <sup>bc</sup> | 0.052 $\pm$ 0.001 <sup>e</sup>  | 0.064 $\pm$ 0.003 <sup>cd</sup> |
| Succinic acid                                                                                                                                                                                                                                             | 0.35 $\pm$ 0.01 <sup>a</sup>    | 0.20 $\pm$ 0.01 <sup>b</sup>    | 0.32 $\pm$ 0.01 <sup>a</sup>    | 0.18 $\pm$ 0.01 <sup>b</sup>    | 0.19 $\pm$ 0.03 <sup>b</sup>    | 0.17 $\pm$ 0.01 <sup>b</sup>    |
| Fumaric acid                                                                                                                                                                                                                                              | 0.050 $\pm$ 0.005 <sup>b</sup>  | 0.058 $\pm$ 0.000 <sup>a</sup>  | 0.043 $\pm$ 0.001 <sup>c</sup>  | 0.025 $\pm$ 0.001 <sup>de</sup> | 0.024 $\pm$ 0.001 <sup>e</sup>  | 0.031 $\pm$ 0.001 <sup>d</sup>  |
| Maleic acid                                                                                                                                                                                                                                               | 0.024 $\pm$ 0.001 <sup>ab</sup> | 0.026 $\pm$ 0.001 <sup>a</sup>  | 0.027 $\pm$ 0.001 <sup>a</sup>  | 0.026 $\pm$ 0.001 <sup>a</sup>  | 0.022 $\pm$ 0.001 <sup>b</sup>  | 0.025 $\pm$ 0.001 <sup>a</sup>  |
| Nicotinic acid                                                                                                                                                                                                                                            | 0.050 $\pm$ 0.001 <sup>a</sup>  | 0.044 $\pm$ 0.001 <sup>c</sup>  | 0.046 $\pm$ 0.001 <sup>bc</sup> | 0.048 $\pm$ 0.001 <sup>ab</sup> | 0.038 $\pm$ 0.001 <sup>d</sup>  | 0.047 $\pm$ 0.001 <sup>bc</sup> |
| 2-oxo-glutaric acid                                                                                                                                                                                                                                       | 0.189 $\pm$ 0.031 <sup>a</sup>  | 0.129 $\pm$ 0.011 <sup>b</sup>  | 0.123 $\pm$ 0.006 <sup>b</sup>  | 0.052 $\pm$ 0.006 <sup>c</sup>  | 0.034 $\pm$ 0.004 <sup>c</sup>  | 0.044 $\pm$ 0.003 <sup>c</sup>  |
| Citric acid                                                                                                                                                                                                                                               | 9.45 $\pm$ 0.52 <sup>b</sup>    | 4.40 $\pm$ 0.27 <sup>d</sup>    | 11.19 $\pm$ 0.20 <sup>a</sup>   | 6.22 $\pm$ 0.33 <sup>c</sup>    | 2.85 $\pm$ 0.19 <sup>e</sup>    | 7.01 $\pm$ 0.25 <sup>c</sup>    |
| Galacturonic acid                                                                                                                                                                                                                                         | 0.121 $\pm$ 0.014 <sup>c</sup>  | 0.152 $\pm$ 0.009 <sup>c</sup>  | 0.199 $\pm$ 0.016 <sup>c</sup>  | 0.312 $\pm$ 0.029 <sup>c</sup>  | 2.169 $\pm$ 0.362 <sup>b</sup>  | 2.658 $\pm$ 0.051 <sup>a</sup>  |
| 2-amino-2-deoxy-D-gluconic acid                                                                                                                                                                                                                           | 0.056 $\pm$ 0.006 <sup>a</sup>  | 0.043 $\pm$ 0.004 <sup>ab</sup> | 0.053 $\pm$ 0.007 <sup>ab</sup> | 0.056 $\pm$ 0.009 <sup>a</sup>  | 0.057 $\pm$ 0.003 <sup>a</sup>  | 0.037 $\pm$ 0.001 <sup>b</sup>  |
| cis-3-caffeoyl-quinic acid                                                                                                                                                                                                                                | 0.036 $\pm$ 0.002 <sup>c</sup>  | 0.060 $\pm$ 0.004 <sup>a</sup>  | 0.047 $\pm$ 0.003 <sup>b</sup>  | 0.048 $\pm$ 0.002 <sup>b</sup>  | 0.050 $\pm$ 0.002 <sup>b</sup>  | 0.049 $\pm$ 0.003 <sup>b</sup>  |
| trans-3-caffeoyl-quinic acid                                                                                                                                                                                                                              | 0.029 $\pm$ 0.002 <sup>c</sup>  | 0.047 $\pm$ 0.004 <sup>a</sup>  | 0.040 $\pm$ 0.003 <sup>ab</sup> | 0.039 $\pm$ 0.002 <sup>b</sup>  | 0.041 $\pm$ 0.001 <sup>ab</sup> | 0.041 $\pm$ 0.003 <sup>ab</sup> |
| Malic acid                                                                                                                                                                                                                                                | 81.55 $\pm$ 4.29 <sup>a</sup>   | 85.87 $\pm$ 1.26 <sup>a</sup>   | 85.53 $\pm$ 2.26 <sup>a</sup>   | 55.06 $\pm$ 3.1 <sup>b</sup>    | 42.83 $\pm$ 1.83 <sup>c</sup>   | 49.72 $\pm$ 1.47 <sup>bc</sup>  |
| <b>Others</b>                                                                                                                                                                                                                                             |                                 |                                 |                                 |                                 |                                 |                                 |
| Phosphoric acid                                                                                                                                                                                                                                           | 15.42 $\pm$ 0.39 <sup>b</sup>   | 15.42 $\pm$ 0.15 <sup>b</sup>   | 17.67 $\pm$ 0.24 <sup>a</sup>   | 13.69 $\pm$ 0.48 <sup>c</sup>   | 14.93 $\pm$ 0.48 <sup>b</sup>   | 13.60 $\pm$ 0.57 <sup>c</sup>   |
| Urea                                                                                                                                                                                                                                                      | 0.049 $\pm$ 0.003 <sup>a</sup>  | 0.052 $\pm$ 0.004 <sup>a</sup>  | 0.034 $\pm$ 0.002 <sup>b</sup>  | 0.034 $\pm$ 0.001 <sup>bc</sup> | 0.026 $\pm$ 0.002 <sup>c</sup>  | 0.034 $\pm$ 0.003 <sup>b</sup>  |
| Putrescine                                                                                                                                                                                                                                                | 0.65 $\pm$ 0.09 <sup>a</sup>    | 0.66 $\pm$ 0.01 <sup>a</sup>    | 0.11 $\pm$ 0.00 <sup>b</sup>    | 0.20 $\pm$ 0.00 <sup>b</sup>    | 0.10 $\pm$ 0.01 <sup>b</sup>    | 0.18 $\pm$ 0.01 <sup>b</sup>    |
